# Supplementary material for: Lung resistance-related protein (LRP) predicts favorable therapeutic outcome in Acute Myeloid Leukemia
Source: PubMed Central journal article supplement (PMC6344578; doi:10.1038/s41598-018-36780-8), 2019-01-23

# **Lung resistance-related protein (LRP) predicts favorable therapeutic outcome in Acute Myeloid Leukemia**

**Running Title:** LRP predicts favorable AML outcome

**Authors:**

\*Bibi Kulsoom,<sup>1,2</sup> Tahir Sultan Shamsi<sup>1</sup> and Nasir Ali Afsar<sup>2</sup>

<sup>1</sup>National Institute of Blood Diseases and Bone Marrow Transplantation, Karachi, Pakistan.

<sup>2</sup>Jinnah Medical and Dental College, Karachi, Pakistan.

**Correspondence:**

\*Bibi Kulsoom. *Email* [drknpk@yahoo.com](mailto:drknpk@yahoo.com) . *Mailing Address:* National Institute of Blood Diseases and Bone Marrow Transplantation, Karachi, Pakistan. *Phone* +92 332 993 6614.

**Supplementary Table 1: Summary of therapeutic outcomes in relationship with MDR1, MRP2 and LRP.** Note the citations as given in the 'References' section in the article.

| Cancer (n)                                              | N citation           | Drugs                                                                                                           | Techniques | <i>Effect of INCREASED gene expression on:</i> |           |           |           |
|---------------------------------------------------------|----------------------|-----------------------------------------------------------------------------------------------------------------|------------|------------------------------------------------|-----------|-----------|-----------|
|                                                         |                      |                                                                                                                 |            | CR                                             | Relapse   | DFS       | OS        |
| <b>Multidrug resistance protein 1 (MDR1)</b>            |                      |                                                                                                                 |            |                                                |           |           |           |
| AML                                                     | 331 <sup>5</sup>     | Daunorubicin, Cytarabine                                                                                        | SqPCR      | Decreased                                      | -         | -         | Decreased |
|                                                         | 211 <sup>6</sup>     |                                                                                                                 | FCM        | Decreased                                      | -         | None      | None      |
|                                                         | 30 <sup>18</sup>     | Daunorubicin, Idarubicin, Etoposide, Mitoxantrone                                                               | qPCR, FCM  | -                                              | None      | -         | -         |
| AML, ALL                                                | 26, 18 <sup>7</sup>  | Anthracyclines, Vincristine, Etoposide                                                                          | qPCR       | None                                           | Increased | -         | -         |
|                                                         | 39, 32 <sup>10</sup> | AML: Cytarabine, Idarubicin,<br>ALL: Vincristine, Prednisone, Daunorubicin, L-asparaginase                      | sqPCR      | None                                           | None      | -         | Decreased |
| ALL                                                     | 49 <sup>19</sup>     | BFM95 Protocol: Methotrexate, Vincristine, Prednisone, Daunorubicin, L-asparaginase                             | sqPCR      | -                                              | Increased | Decreased | -         |
|                                                         | 30 <sup>9</sup>      | Dexametasone, Vincristin, Daunomycin, TIT (Methotrexate, Cytarabine, Dexamethasone), L-asparaginase, Cytarabine | sqPCR      | None                                           | -         | None      | None      |
| Breast                                                  | 59 <sup>16</sup>     | FAC/FEC                                                                                                         | qPCR       | Decreased                                      | -         | Decreased | -         |
|                                                         | 54 <sup>21</sup>     | FAC/FEC                                                                                                         | qPCR       | None                                           | None      | None      | None      |
| Ovary                                                   | 61 <sup>8</sup>      | Carboplatin, Paclitaxel, Cyclophosphamide, Treosulfan, Topotecan, Gemcitabine                                   | sqPCR      | None                                           | -         | Decreased | Decreased |
| <b>Multidrug resistance associated protein 2 (MRP2)</b> |                      |                                                                                                                 |            |                                                |           |           |           |
| AML                                                     | 30 <sup>18</sup>     | Daunorubicin, Idarubicin, Etoposide, Mitoxantrone                                                               | qPCR, FCM  | -                                              | None      | -         | -         |
| ALL                                                     | 105 <sup>26</sup>    | Vincristine, Dexamethasone, L-asparaginase                                                                      | qPCR       | -                                              | Increased | Decreased | -         |
| AML, ALL                                                | 39, 32 <sup>10</sup> | AML: Cytarabine, Idarubicin<br>ALL: Vincristine, Prednisone, Daunorubicin, L-asparaginase                       | sqPCR      | -                                              | -         | -         | Decreased |

|                                                                           |                                     |                                                                                                                 |           |                      |           |           |                      |
|---------------------------------------------------------------------------|-------------------------------------|-----------------------------------------------------------------------------------------------------------------|-----------|----------------------|-----------|-----------|----------------------|
| Breast                                                                    | 59 <sup>16</sup>                    | FAC/FEC                                                                                                         | qPCR      | None                 | -         | -         | -                    |
| Ovary                                                                     | 61 <sup>8</sup>                     | Carboplatin, Paclitaxel, Cyclophosphamide, Treosulfan, Topotecan / Gemcitabine                                  | sqPCR     | None                 | -         | Decreased | -                    |
| Ovary + in vitro Hepatocyte                                               | 22 <sup>27</sup> + in vitro         | Cisplatin                                                                                                       | IHC       | low drug sensitivity | -         | -         | Increased (patients) |
| Esophagus                                                                 | 81 <sup>13</sup>                    | Cisplatin                                                                                                       | IHC, qPCR | -                    | -         | -         | Decreased            |
| <b>Lung resistance related Protein (LRP) or major vault protein (MVP)</b> |                                     |                                                                                                                 |           |                      |           |           |                      |
| AML                                                                       | 331 <sup>5</sup> , 211 <sup>6</sup> | Daunorubicin, Cytarabine                                                                                        | sqPCR     | None                 | -         | -         | -                    |
|                                                                           | 67 <sup>38</sup>                    |                                                                                                                 | sqPCR     | Decreased            | -         | -         | -                    |
| AML, ALL                                                                  | 39, 32 <sup>10</sup>                | AML: Cytarabine, Idarubicin, ALL: Vincristine, Prednisone, Daunorubicin, L-asparaginase                         | sqPCR     | Decreased            | -         | -         | -                    |
| ALL                                                                       | 30 <sup>9</sup>                     | Dexametasone, Vincristin, Daunomycin, TIT (Methotrexate, Cytarabine, Dexamethasone), L-asparaginase, Cytarabine | sqPCR     | None                 | Increased | Decreased | Decreased            |
|                                                                           | 49 <sup>19</sup>                    | BFM95 Protocol: Methotrexate, Vincristine, Prednisone, Daunorubicin, L-asparaginase                             | qPCR      | None                 | -         | -         | -                    |
|                                                                           | 45 <sup>35</sup>                    | Dexamethasone, 6-mercaptopurine, L-asparaginase                                                                 | qPCR      | Decreased            | -         | -         | -                    |
| NSCLC                                                                     | 92 <sup>37</sup>                    | Vinorelbine, Cisplatin                                                                                          | IHC       | -                    | -         | -         | Decreased            |
| Testis                                                                    | 70 <sup>17</sup>                    | Cisplatin                                                                                                       | IHC, WB   | Decreased            | -         | -         | Decreased            |
| Breast                                                                    | 59 <sup>16</sup>                    | FAC/FEC                                                                                                         | qPCR      | -                    | -         | Decreased | -                    |

### Abbreviations:

**ALL:** Acute lymphoblastic leukemia; **AML:** Acute myeloid leukemia; **CR:** Complete remission; **DFS:** Disease-free survival; **FAC/FEC:** fluorouracil, doxorubicin/ epirubicin, cyclophosphamide; **FCM:** Flow cytometry; **IHC:** Immunohistochemistry; **NSCLC:** Non-small cell lung cancer; **OS:** Overall survival; **qPCR:** Quantitative polymerase chain reaction; **sqPCR:** Semi-quantitative polymerase chain reaction; **WB:** Western blotting.

**Supplementary Figure 1:** Boxplots showing gene expression (logarithmic scale) of MDR-1, MRP-2, and LRP in bone marrow (M) and peripheral blood (B). Note the uniform distribution (linear scale) of the Cq values of the house-keeping gene GAPDH in bone marrow and blood samples.

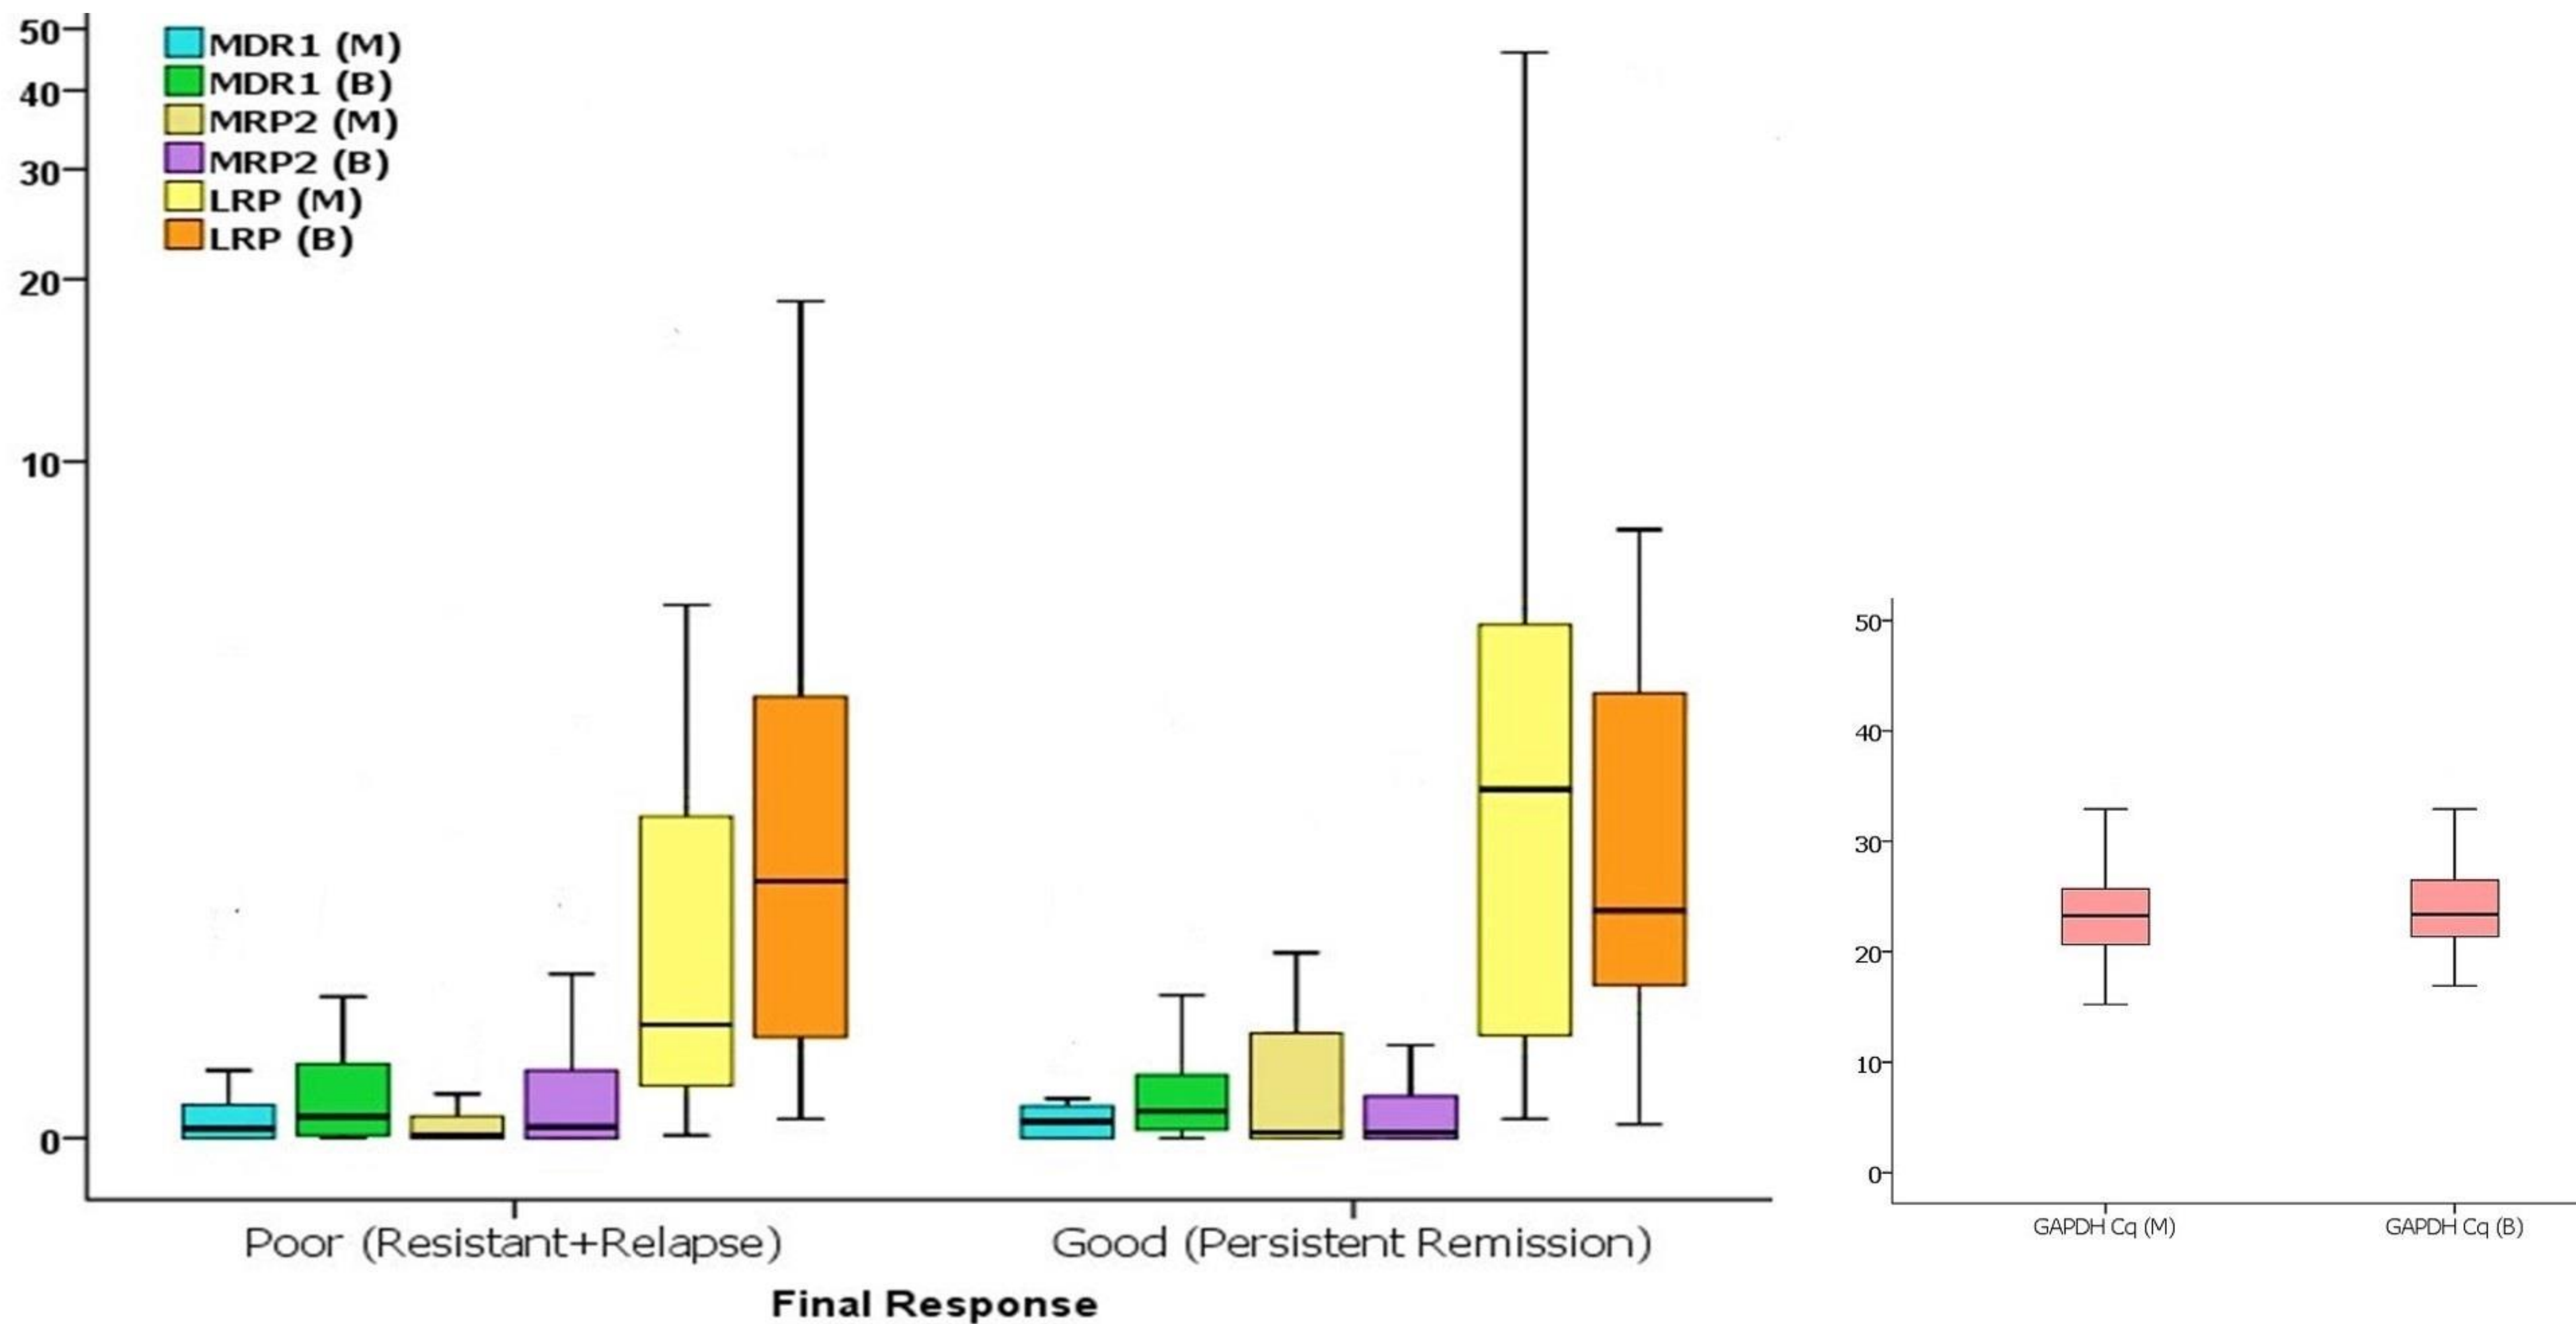

**Supplementary Figure 2:** Kaplan-Meier survival curves at OncoLnc® database ([www.oncolnc.org/search\\_results/?q=mvp](http://www.oncolnc.org/search_results/?q=mvp)) according to LRP (MVP) expression in invasive carcinoma of breast (BRCA), renal papillary cell carcinoma (KIRP), sarcoma (SARC), and AML (LAML). The adjusted p-values (q-values) are given.

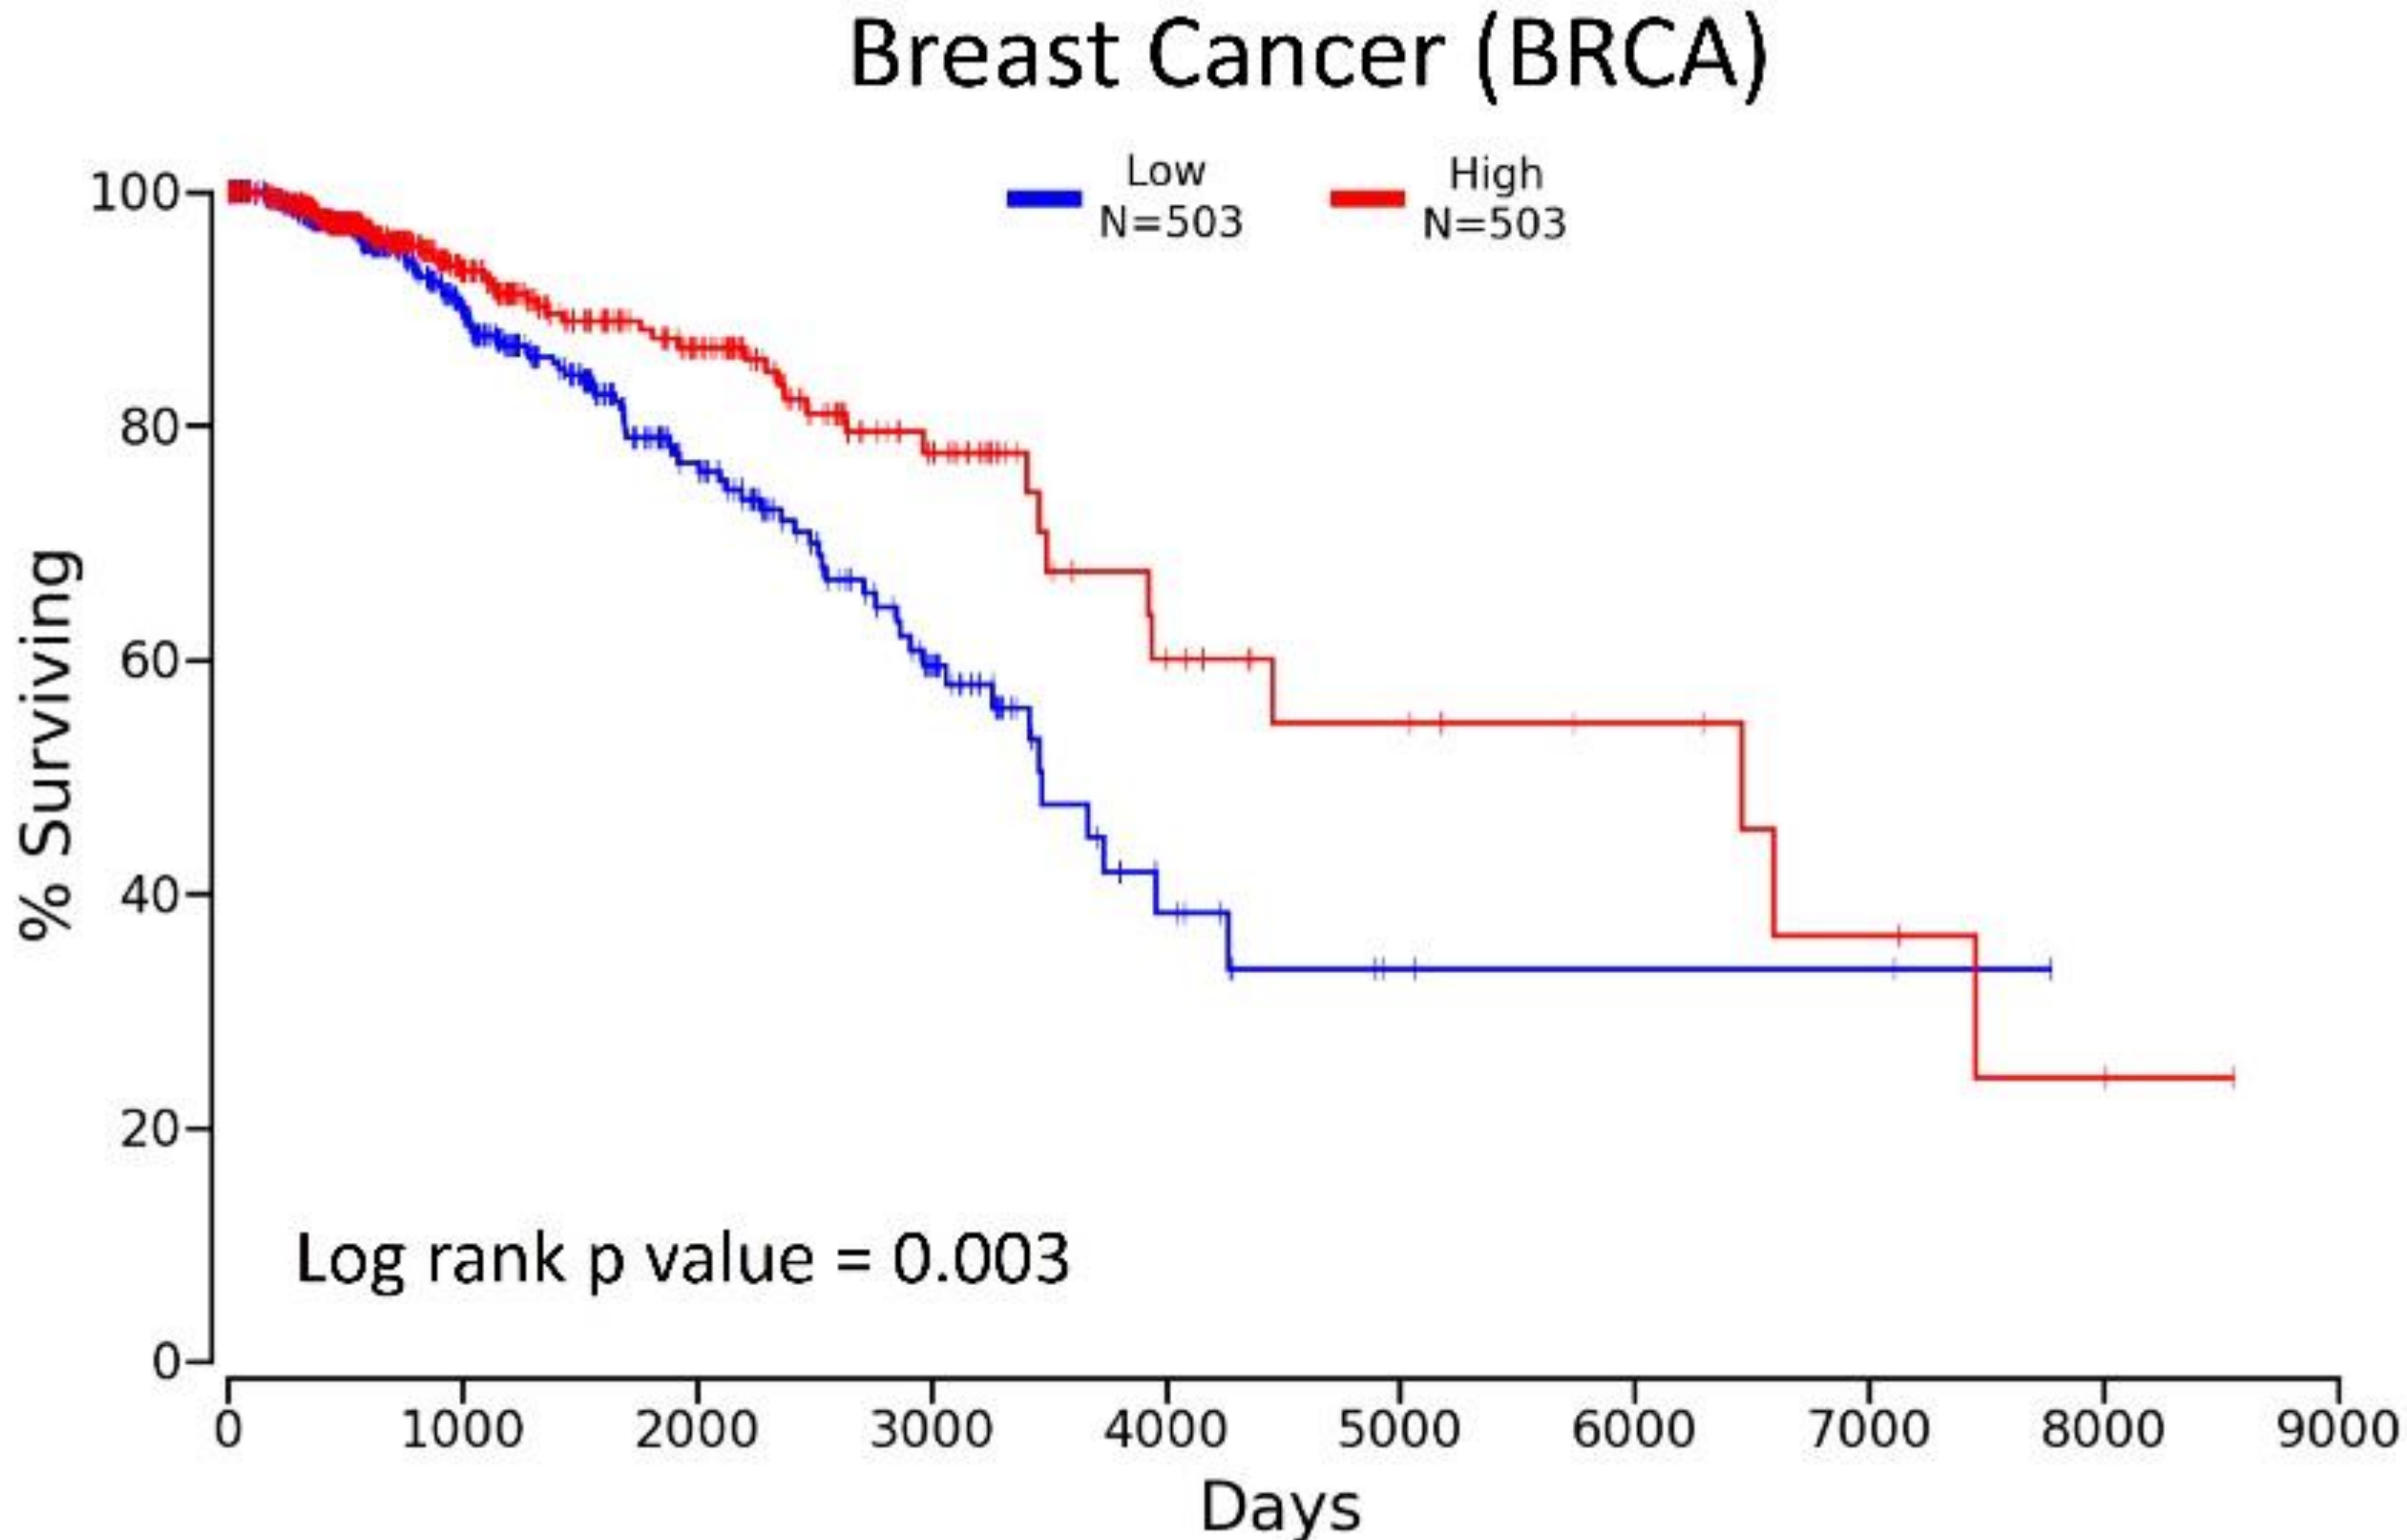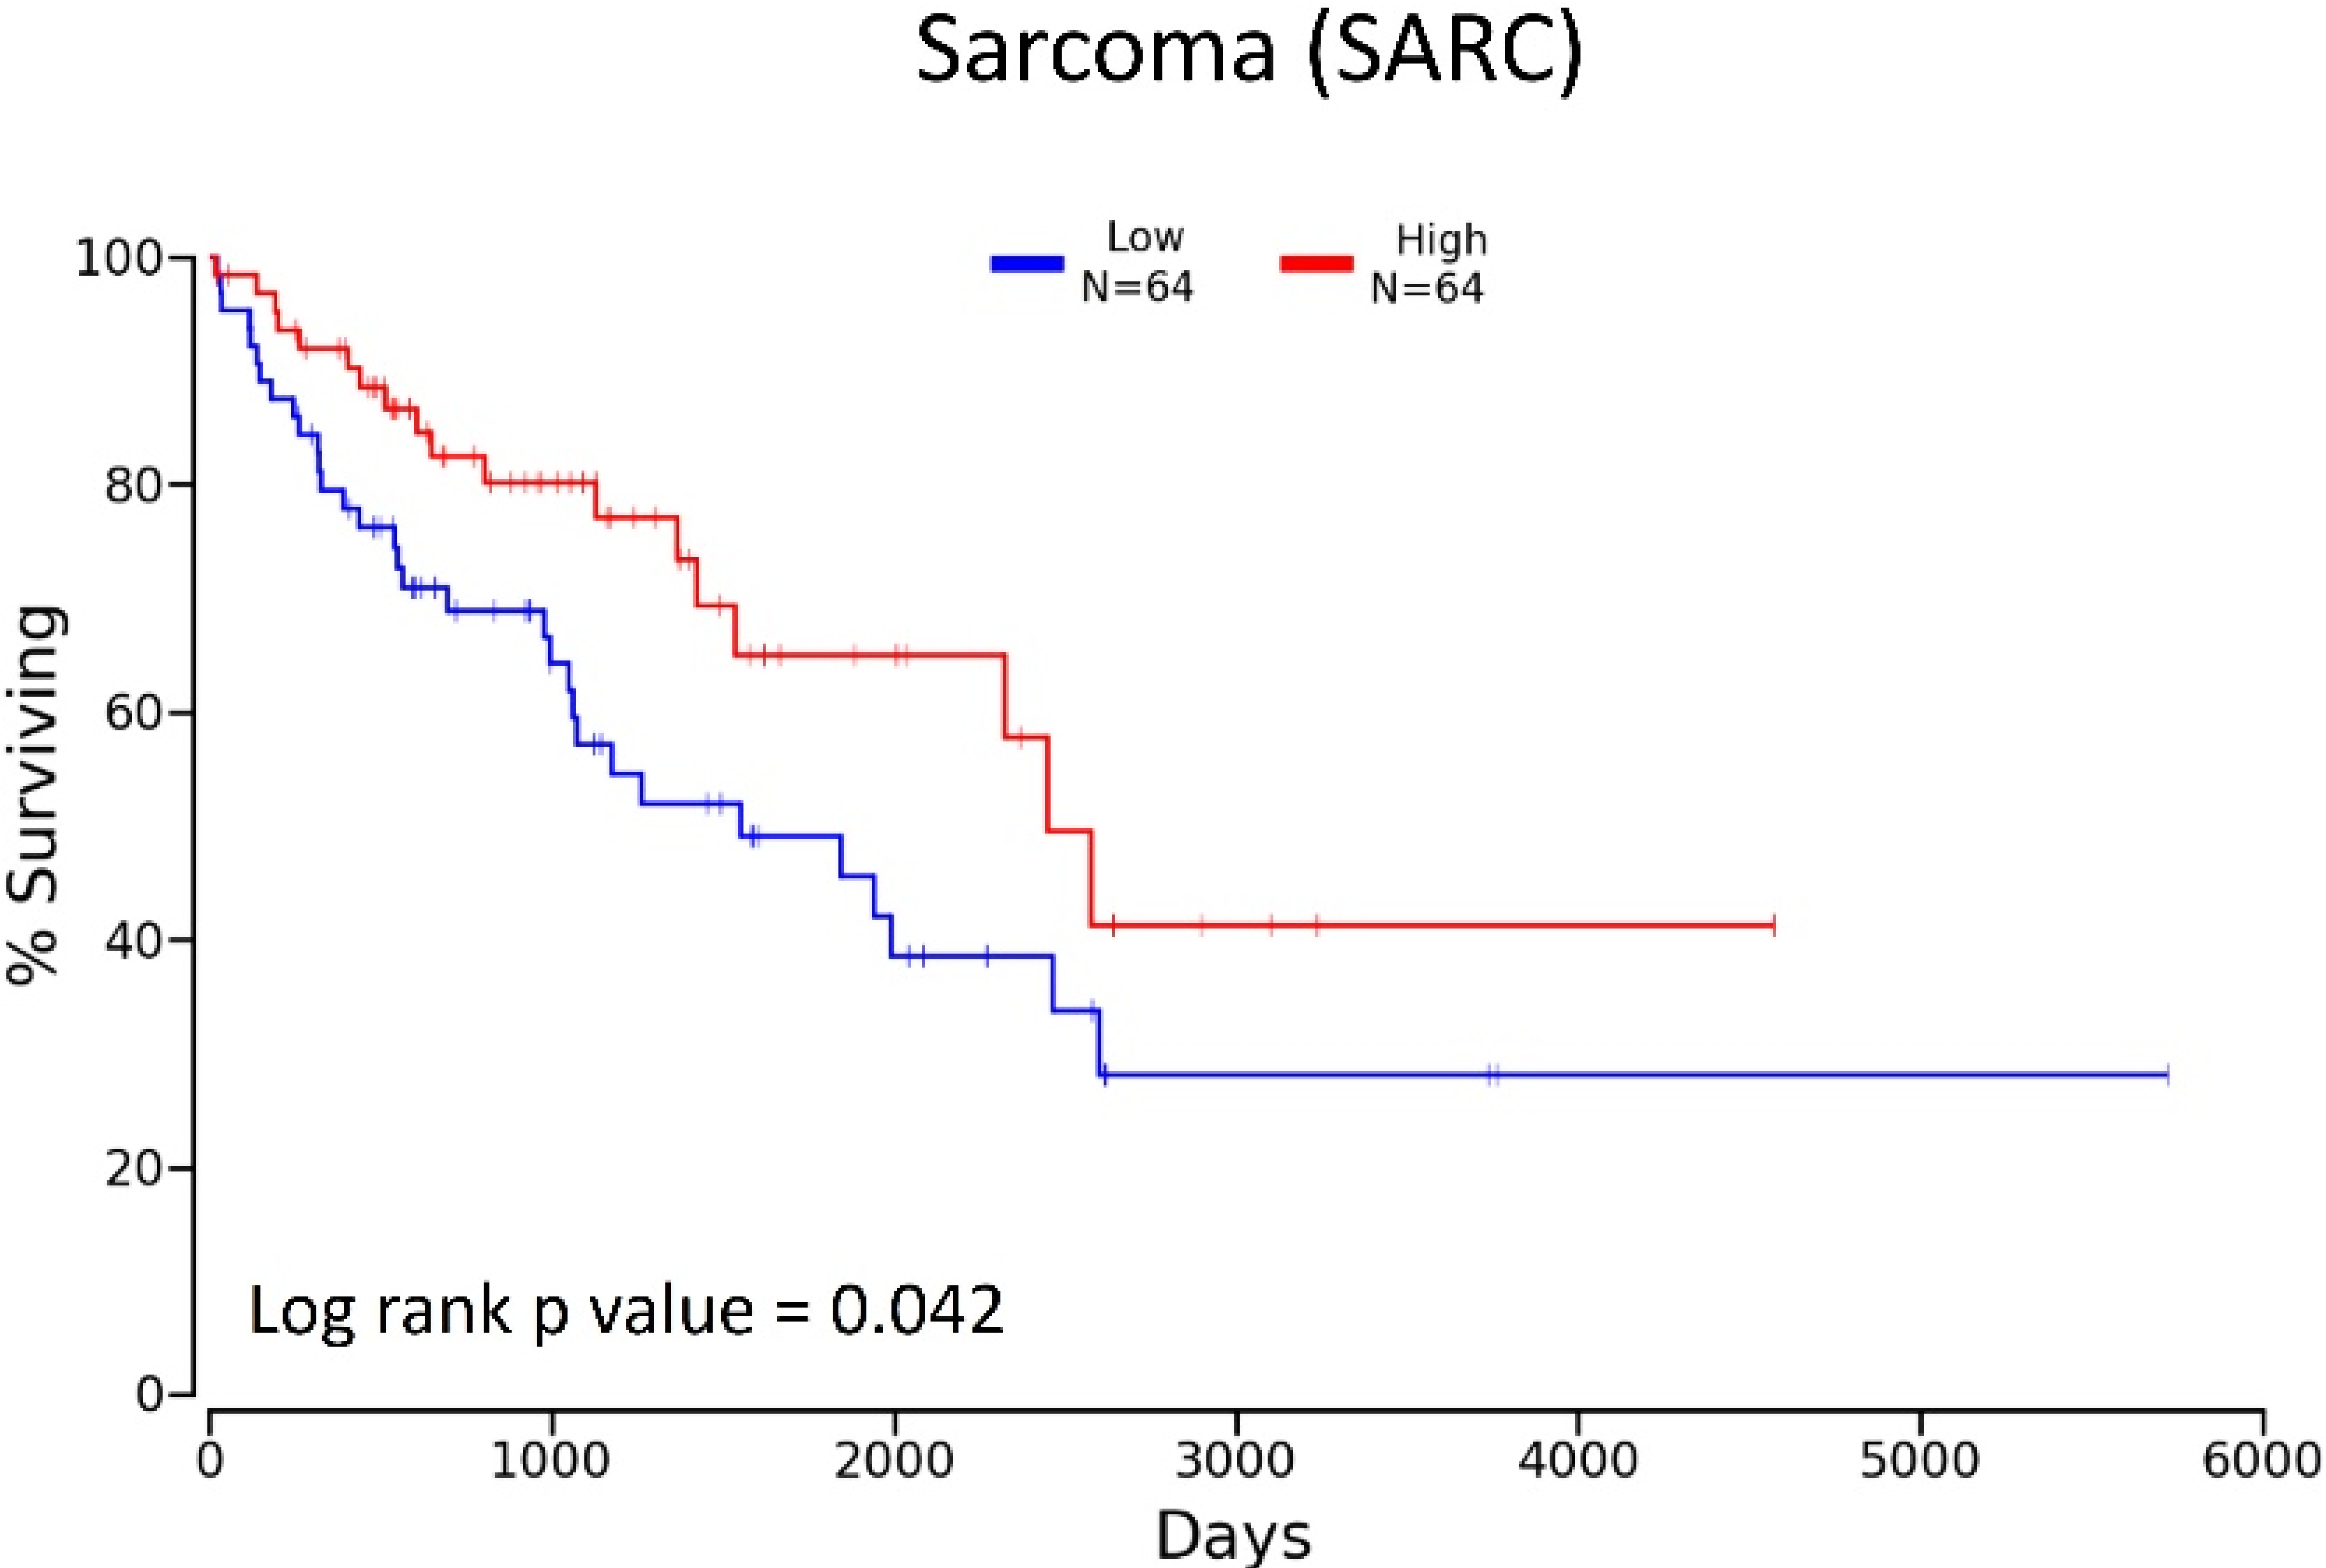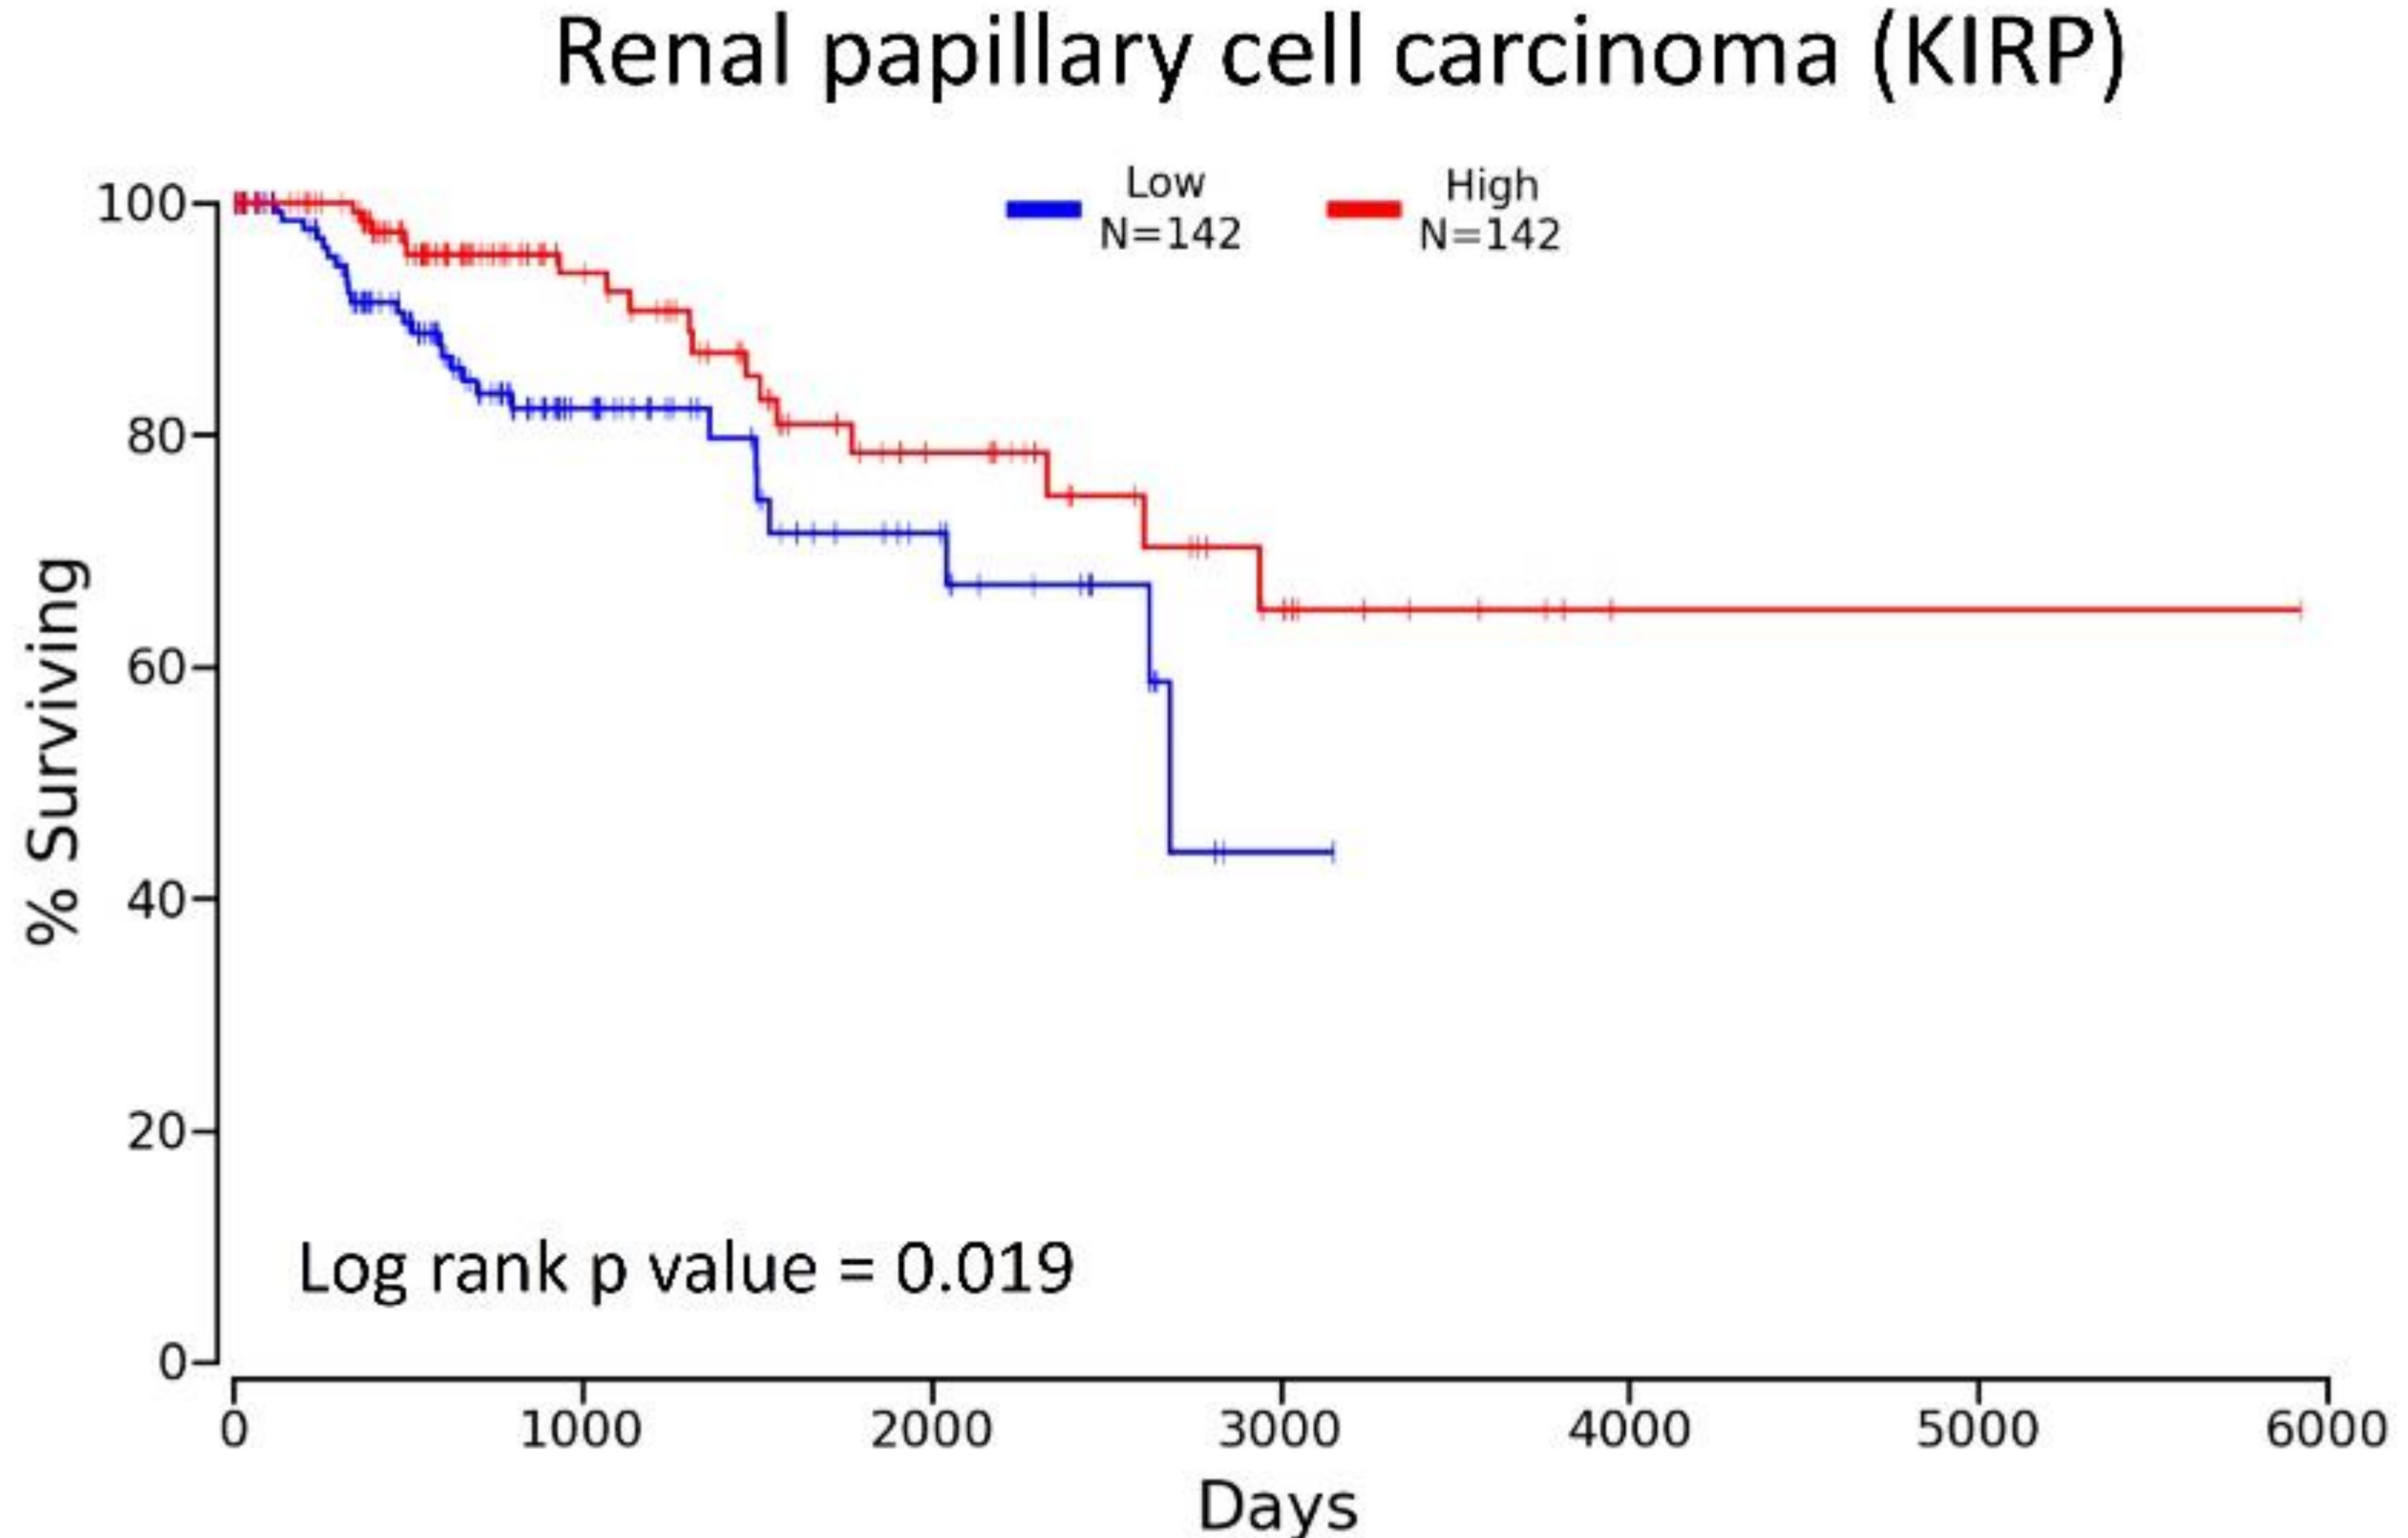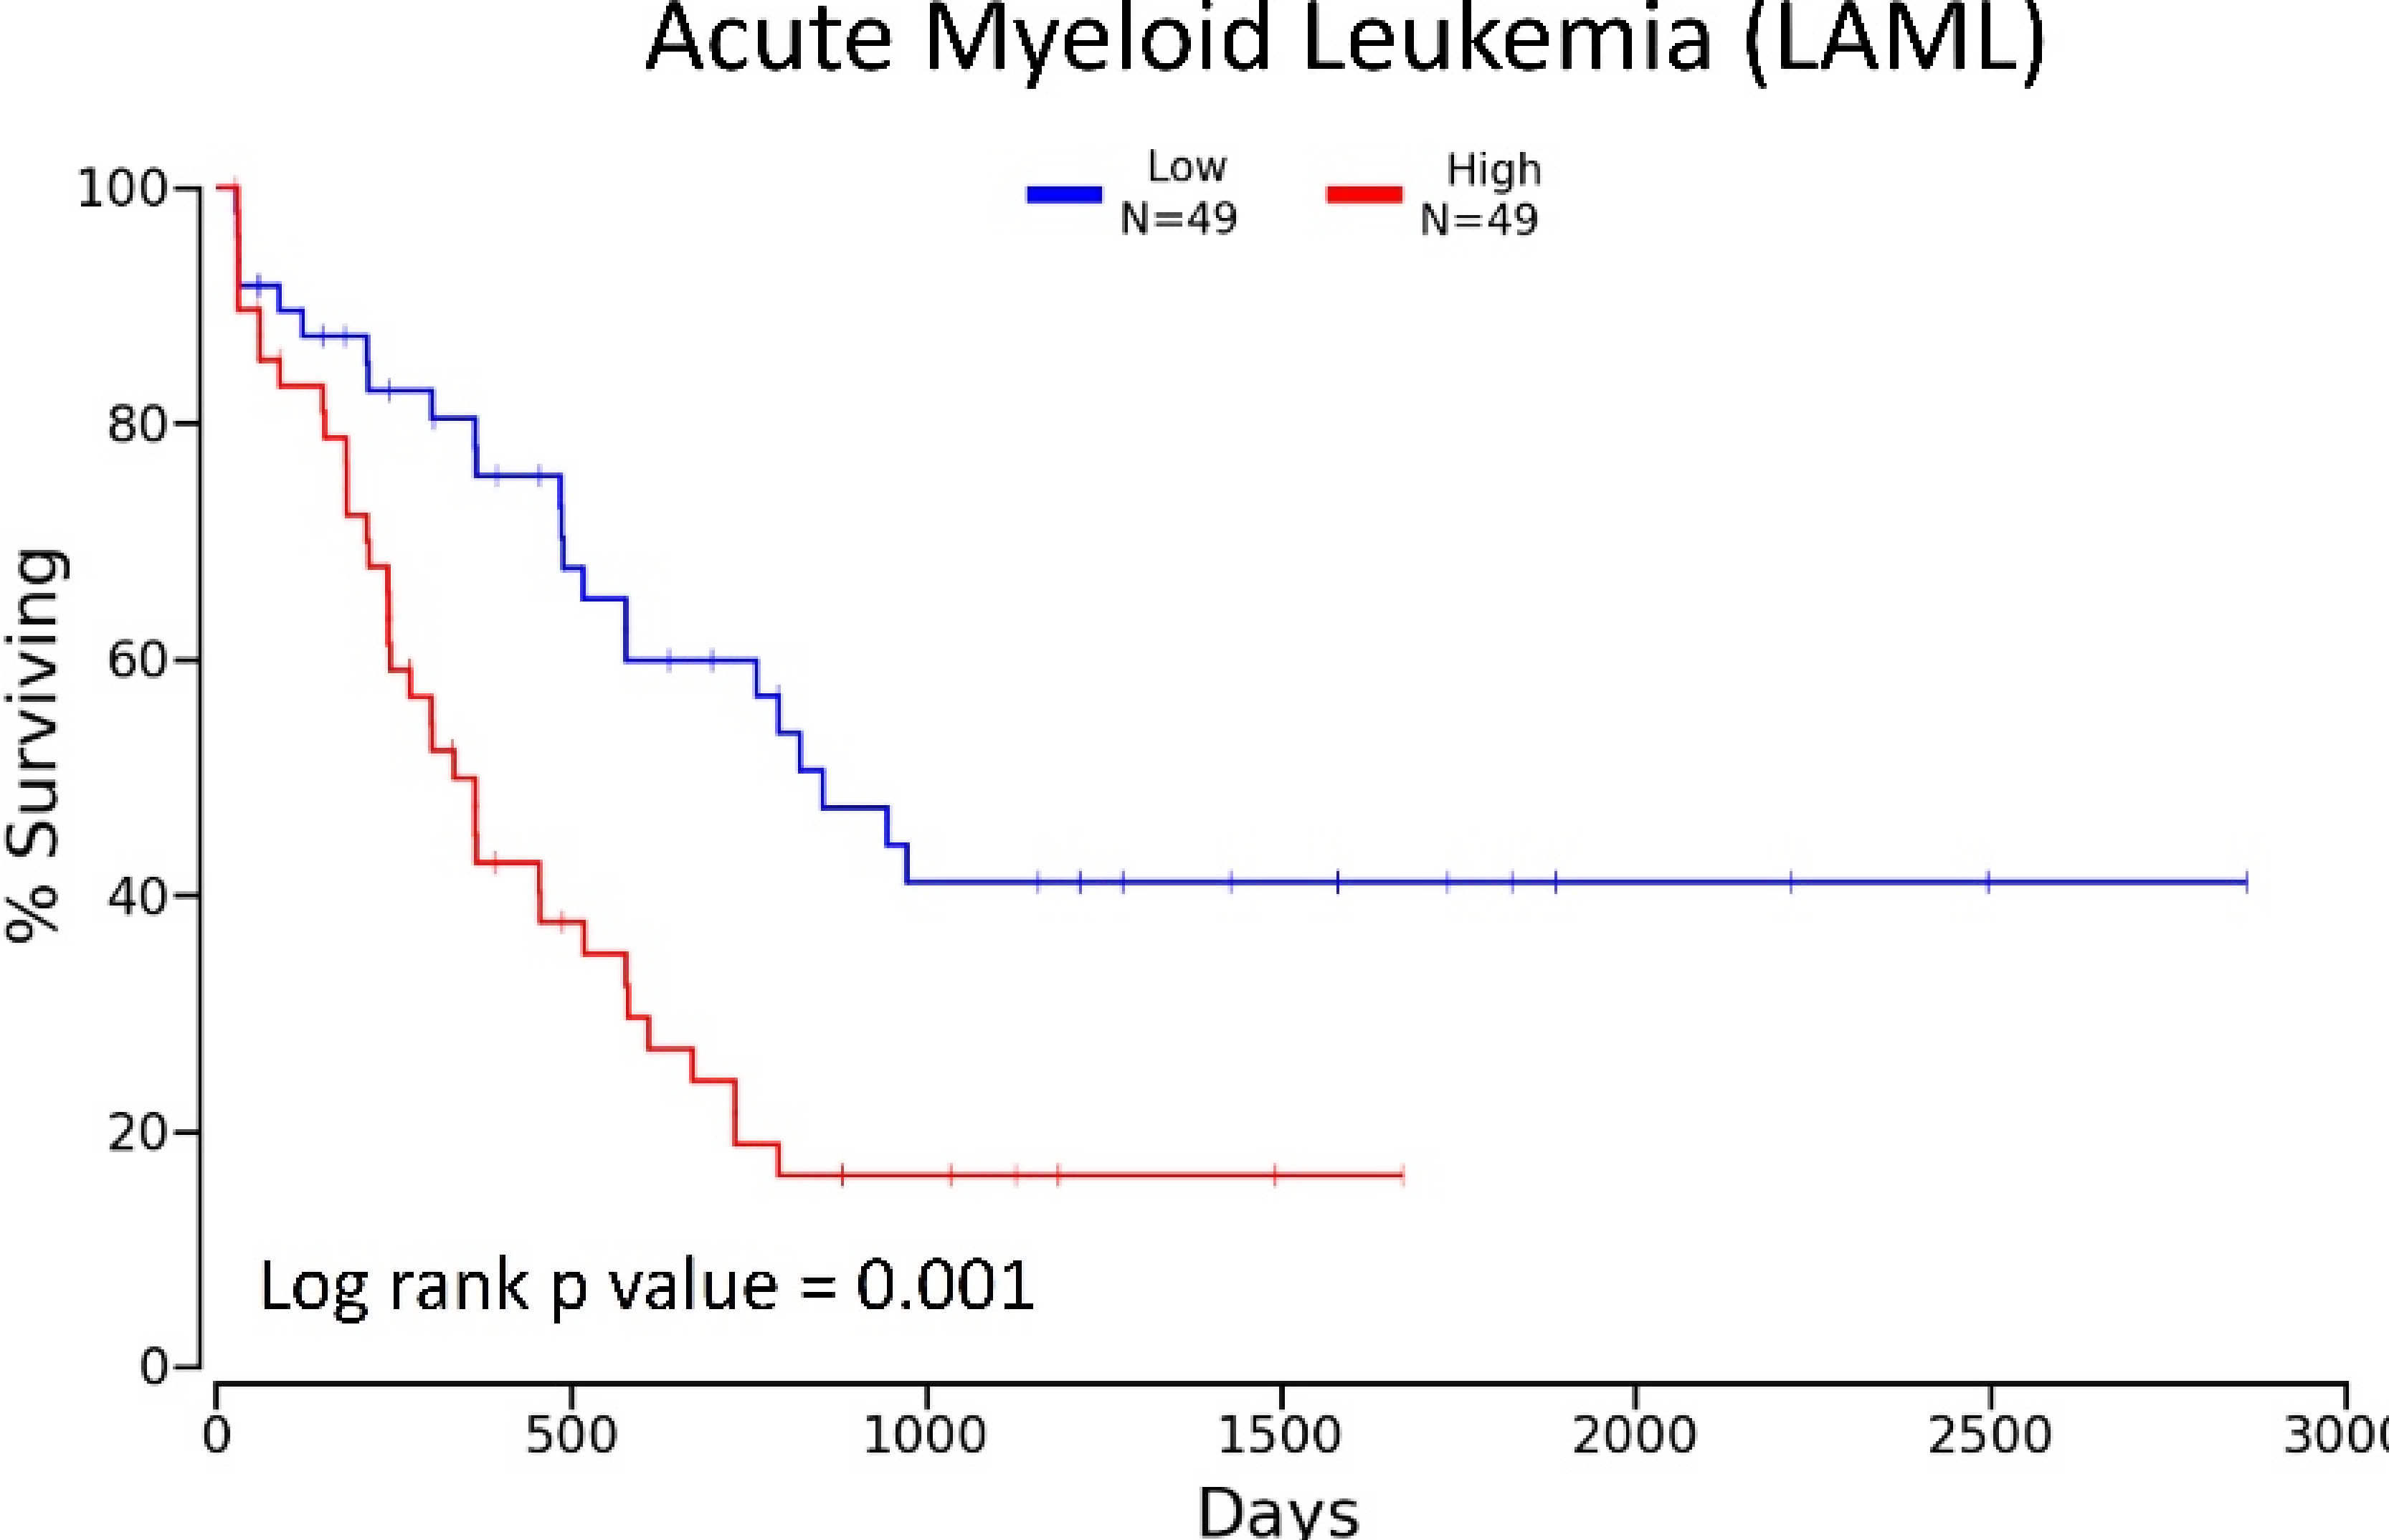

Supplement: 41598_2018_36780_MOESM1_ESM.pdf [file 41598_2018_36780_MOESM1_ESM.pdf]
